# Supplementary material for: Determination of Floral Origin Markers of Latvian Honey by Using IRMS, UHPLC-HRMS, and 1H-NMR
Source: MDPI journal article supplement (doi:10.3390/foods11010042), 2021-12-24
Supplement: s1 [file s1]

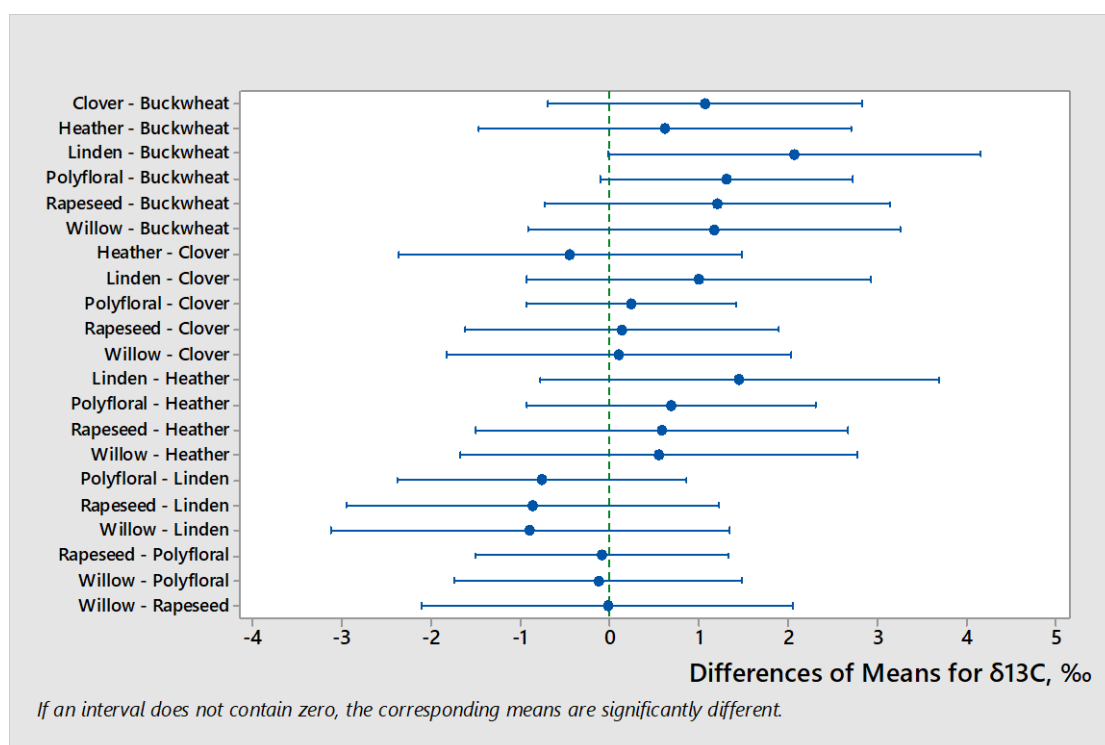

**Figure S1.** A graphical summary of ANOVA one-way test of statistically significant  $\delta^{13}\text{C}$  value difference between monofloral buckwheat, clover, heather, linden, rapeseed, willow and polyfloral honey proteins using Tukey comparison of 95% confidence intervals.

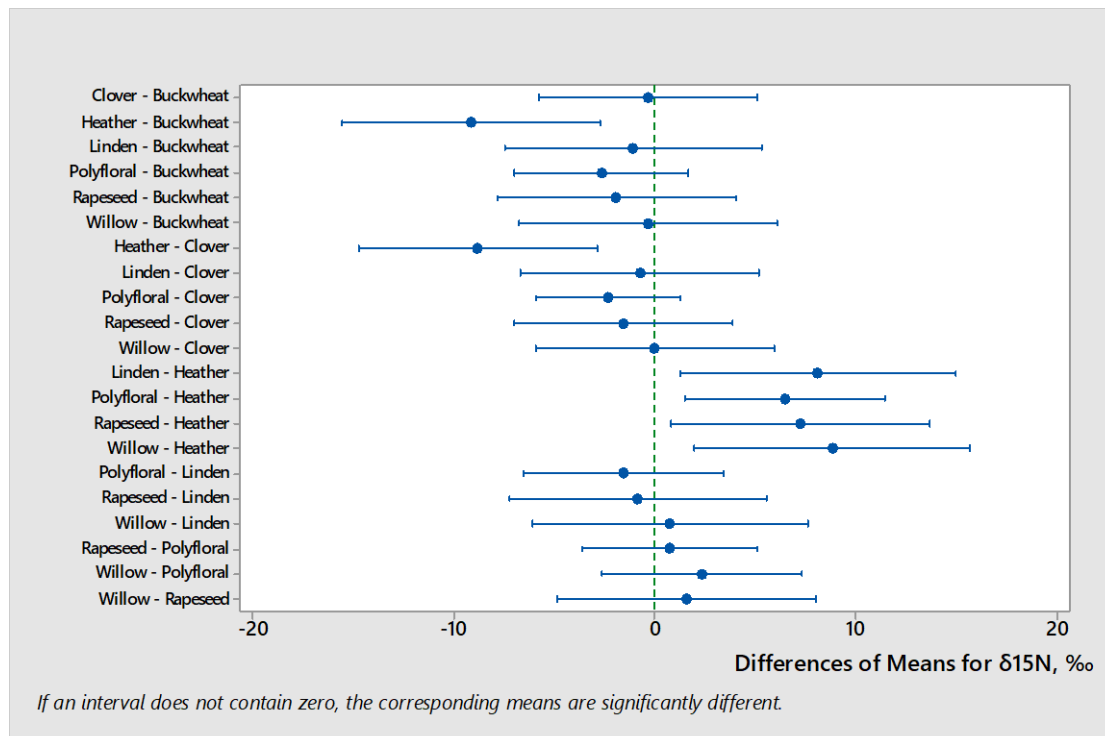

**Figure S2.** A graphical summary of ANOVA one-way test of statistically significant  $\delta^{15}\text{N}$  value difference between monofloral buckwheat, clover, heather, linden, rapeseed, willow and polyfloral honey proteins using Tukey comparison of 95% confidence intervals.

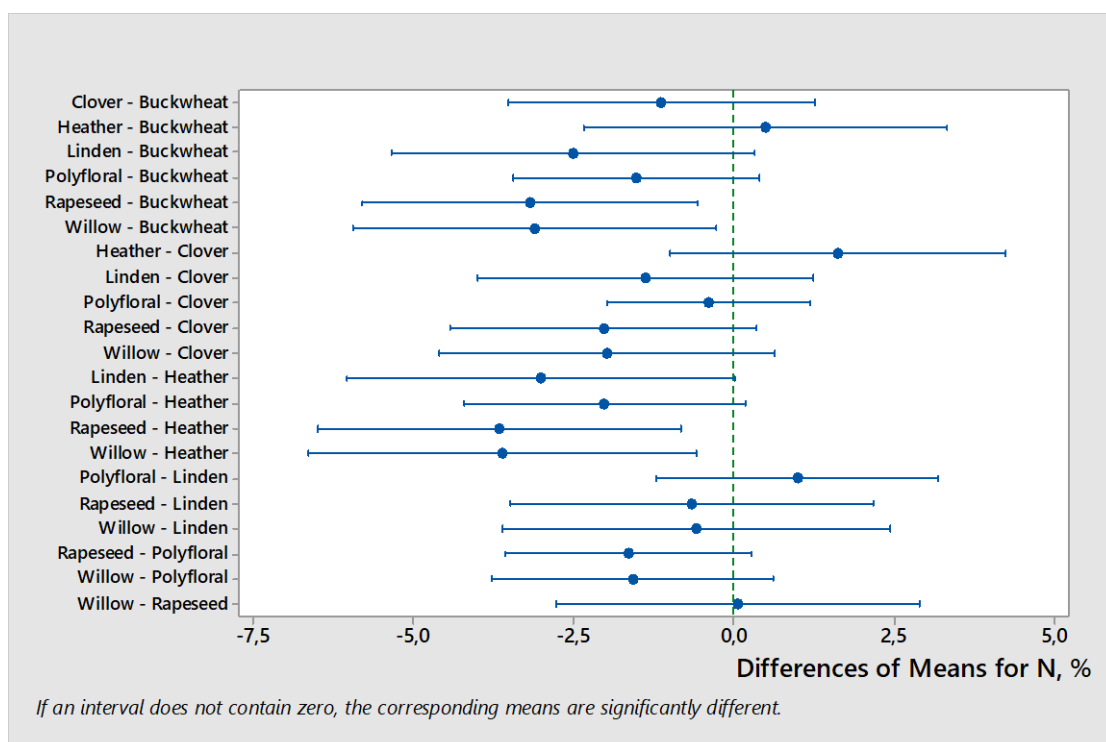

**Figure S3.** A graphical summary of ANOVA one-way test of statistically significant total N (%) value difference between monofloral buckwheat, clover, heather, linden, rapeseed, willow and polyfloral honey proteins using Fisher comparison of 95% confidence intervals.

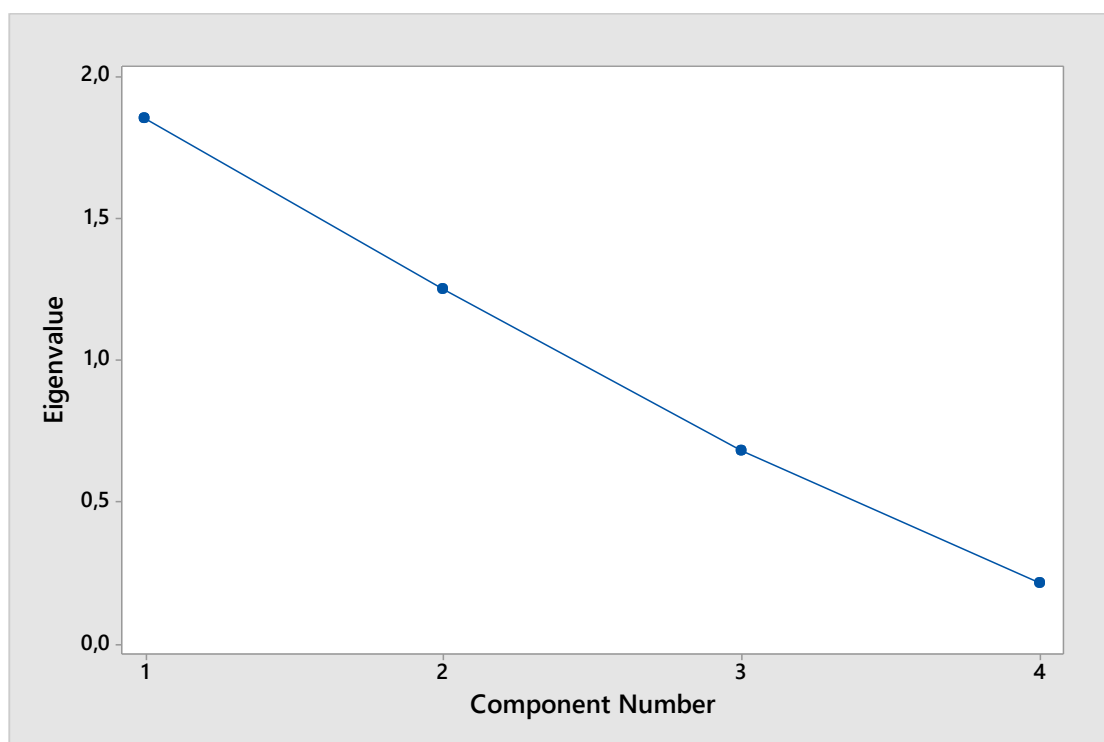

**Figure S4.** Scree plot of PCA eigenvalues of components. As input data variables were used  $\delta^{13}\text{C}$ ,  $\delta^{15}\text{N}$ , total C & N in proteins.

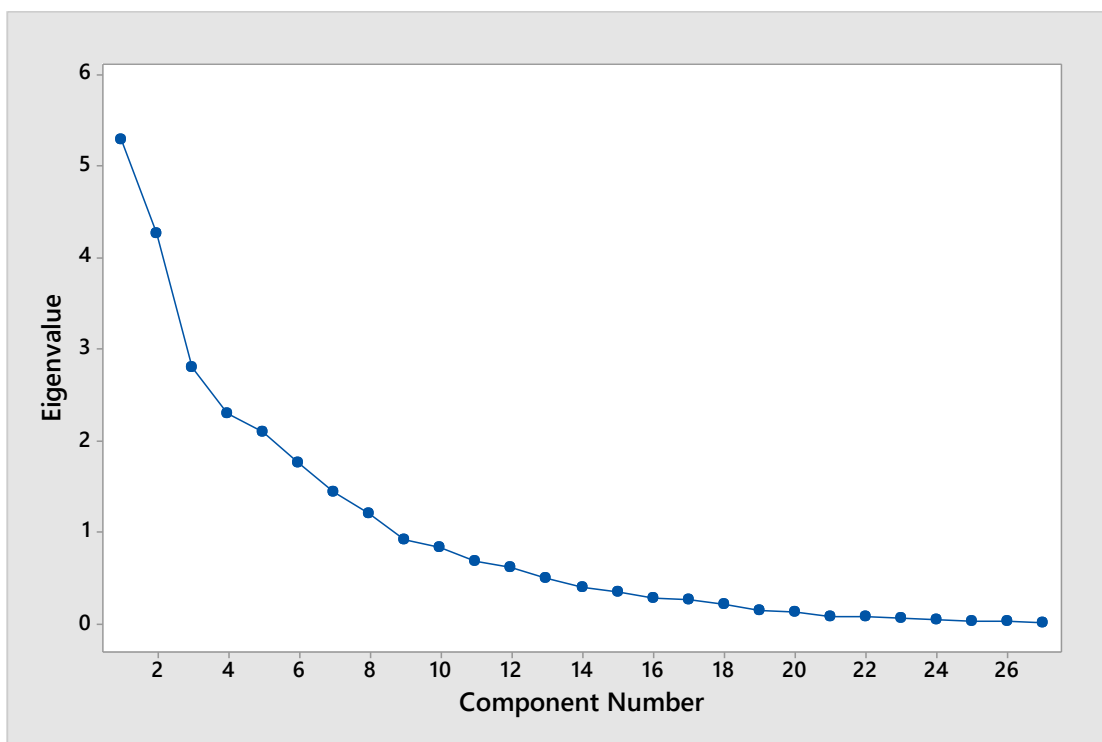

**Figure S5.** Scree plot of PCA eigenvalues of components. As input data variables are used from UHPLC-HRMS obtained concentrations of organic compounds.

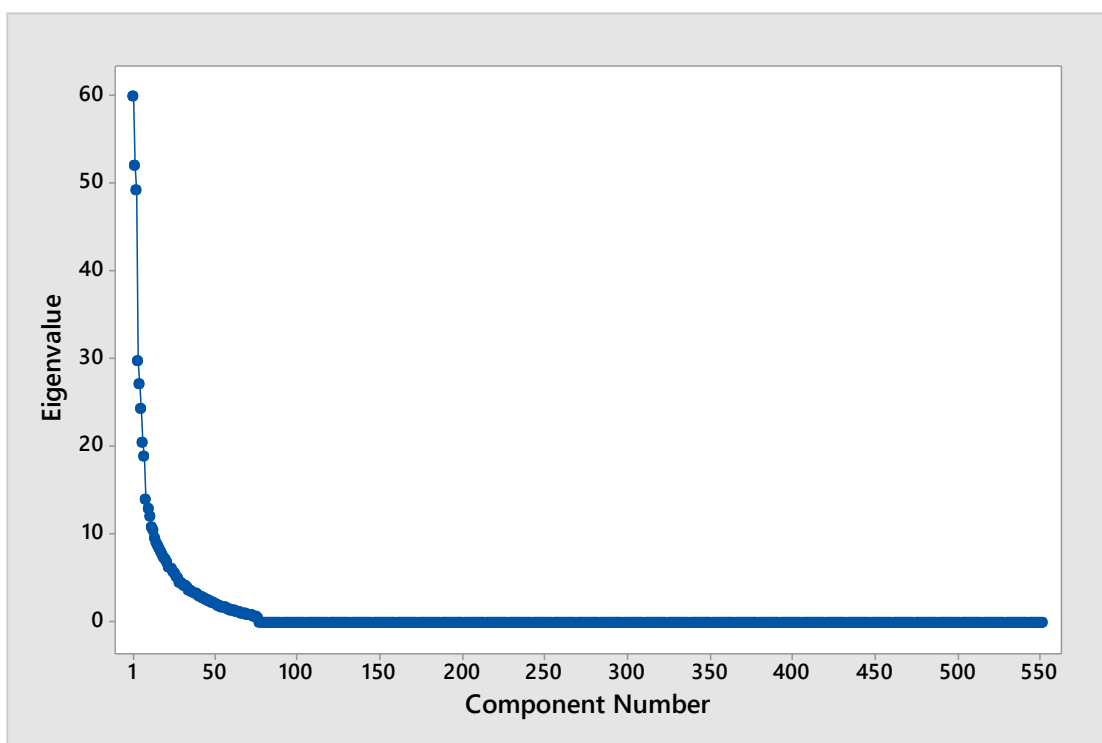

**Figure S6.** Scree plot of PCA eigenvalues of components. As input data variables are used binned  $^1\text{H}$ -NMR spectra intervals 9.0-6.0 & 3.0-0.5 ppm with bin width 0.01 ppm.

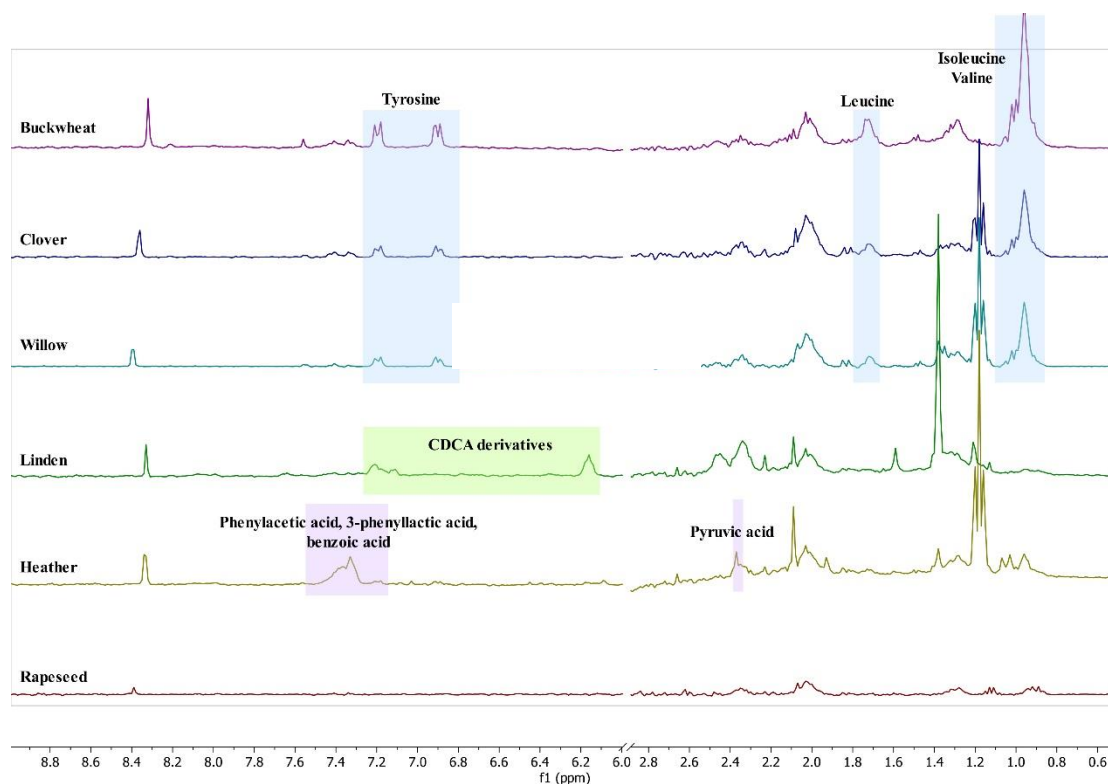

**Figure S7.**  $^1\text{H}$ -NMR spectra interval (0.5–3.0 & 4.5–8.5 ppm) overlaid comparison of monofloral buckwheat, clover, willow, linden, heather, rapeseed honey.
