# Supplementary material for: Determination of Floral Origin Markers of Latvian Honey by Using IRMS, UHPLC-HRMS, and 1H-NMR
Source: Foods. 2021 Dec 24;11(1):42. doi: 10.3390/foods11010042 (PMC8750591; doi:10.3390/foods11010042)
Supplement: Supplementary file 1 [file foods-11-00042-s001.zip › Supplementary workbook.xlsx]

## Sheet: Data 
Foods ID	Type	Monofloral/Polyfloral	Full/Partial	Melissopalynology						IRMS							UHPLC-HRMS
										Principal component scores			Variables				Principal component scores			Variables (Concentration, μg/kg)
				Buckwheat pollen, %	Clover pollen, %	Heather pollen, %	Linden pollen, %	Rapeseed pollen, %	Willow pollen, %	IRMS PC1	IRMS PC2	IRMS PC3	δ13C, ‰	δ15N, ‰	C, %	N, %	UHPLC-HRMS PC1	UHPLC-HRMS PC2	UHPLC-HRMS PC3	p-Hydroxybenzoic acid	Abscisic acid	p-Coumaric acid	Kaempferol	Ferulic acid	3,4-Dihydroxybenzoic acid	Quercetin	Pantothenic acid (B5)	Luteolin	Vanillic acid	Caffeic acid	Syringic acid	Phenylacetic acid	Rutin	o-Coumaric acid	Genistein	Gallic acid	Galangin	Acacetin	Chlorogenic acid	Rhamnetin	Daidzein	Sinapic acid	Isovitexin	Epicatechin	Apigenin	Myricetin	Catechin	Chrysin	Folic acid
B1	Buckwheat	Monofloral	Partial	0.45	0	0	0	0	0	Outliner			-29.643	7.504	0.464	0.103	-0.783197	6.28529	-0.436671	19823	2040	7001	606	946	1110	870	603	47	173	373	58	352	816	3	66	47	8	64	63	12	7	26	<LOQ	5	<LOQ	1	<LOQ	<LOQ	<LOQ
B2	Buckwheat	Monofloral	Partial	0.396	0	0	0	0	0	-0.827593	0.242512	0.482396	-27.731	4.215	0.474	0.089	2.28371	1.85068	1.03862	7219	3075	3811	1826	2502	1123	1509	1208	101	1096	508	62	459	347	101	182	77	18	95	118	11	17	22	<LOQ	4	<LOQ	2	<LOQ	<LOQ	<LOQ
B3	Buckwheat	Monofloral	Partial	0.48	0	0	0	0	0	-0.288119	1.78558	1.97331	-28.877	7.535	0.502	0.096	6.20756	3.62231	0.463845	14418	3078	6024	1544	2222	1350	2035	1089	477	598	988	108	855	583	45	180	129	8	95	147	18	14	18	1	2	1	4	<LOQ	<LOQ	<LOQ
B4	Buckwheat	Monofloral	Full	0.464	0.176	0.04	0	0.072	0.044	-0.39867	1.19788	2.18365	-28.71	8.094	0.483	0.094	-0.113394	4.14868	0.257586	13990	1970	5406	1141	1020	892	773	738	47	541	457	128	446	541	32	134	52	7	71	51	12	5	21	4	4	1	2	<LOQ	<LOQ	<LOQ
C1	Clover	Monofloral	Full	0.064	0.78	0	0	0.032	0	Outliner			-29.072	7.008	0.48	0.107	-0.115144	3.04211	-0.910583	16447	1073	5888	473	1036	1195	577	395	250	280	399	41	390	184	118	267	41	27	176	85	24	22	21	<LOQ	8	1	1	<LOQ	2	<LOQ
C2	Clover	Monofloral	Full	0.034	0.56	0	0	0.224	0	-0.414746	-0.224238	1.31934	-27.5	7.274	0.476	0.093	Outliner			7697	2919	3679	781	1493	652	565	664	761	425	357	201	372	75	6	193	500	16	129	75	21	18	22	<LOQ	2	1	1	<LOQ	<LOQ	<LOQ
C3	Clover	Monofloral	Full	0.056	0.488	0	0	0.038	0.068	0.0569646	0.897269	2.04893	-28.465	8.618	0.486	0.089	1.534	4.05127	-1.23832	11101	3809	4162	1026	1658	899	685	987	120	426	644	97	557	436	24	108	123	3	70	119	10	4	23	3	17	3	1	<LOQ	4	<LOQ
C4	Clover	Monofloral	Full	0	0.536	0	0	0	0.178	-0.112746	-0.789002	-0.820762	-26.577	3.129	0.487	0.08	0.352641	-1.83125	-2.41276	2315	8857	2887	491	1753	283	231	786	527	376	572	607	517	2	7	183	216	53	162	45	32	46	32	<LOQ	2	2	<LOQ	<LOQ	1	<LOQ
C5	Clover	Monofloral	Full	0	0.828	0	0	0	0.048	3.14322	1.67932	-0.783263	-27.653	6.257	0.581	0.058	Outliner			3105	4369	3994	584	2475	250	281	902	353	561	1043	72	872	23	2	258	53	364	171	156	146	216	25	<LOQ	9	13	1	14	1	<LOQ
C6	Clover	Monofloral	Full	0.052	0.504	0	0	0.336	0	0.937405	-0.51353	0.10163	-26.809	6.68	0.506	0.078	0.137724	0.447986	-0.117177	6778	2182	3007	1465	2168	522	797	852	123	793	433	96	419	139	11	252	52	38	113	52	23	33	27	<LOQ	2	1	2	<LOQ	3	9
H1	Heather	Monofloral	Full	0	0.036	0.424	0	0.14	0.044	-2.08685	1.22919	-0.633737	-28.214	-0.954	0.472	0.093	-3.32718	-0.315861	-0.665924	2288	3589	1885	631	1247	315	252	1197	104	229	296	49	317	<LOQ	72	193	31	47	90	16	27	53	42	6	1	<LOQ	1	<LOQ	<LOQ	<LOQ
H2	Heather	Monofloral	Full	0	0	0.804	0	0	0	-3.20125	1.13199	-0.885166	-27.989	-2.728	0.467	0.107	-2.07114	-0.0593289	-1.32007	3389	6546	3555	303	2312	287	77	1535	46	158	345	25	398	<LOQ	21	469	34	11	186	13	23	13	60	<LOQ	1	<LOQ	<LOQ	<LOQ	<LOQ	<LOQ
H3	Heather	Monofloral	Full	0	0.068	0.548	0	0.036	0	-2.74529	1.63088	-1.22388	-28.1832	-3.2605	0.482226	0.101201	-2.28754	0.186943	0.0324655	3274	5347	2118	1126	972	485	266	1808	50	184	286	59	488	<LOQ	50	226	49	4	83	22	14	2	89	10	3	<LOQ	2	<LOQ	<LOQ	<LOQ
L1	Linden	Monofloral	Partial	0	0	0	0.42	0	0	1.42488	-1.06202	-0.214726	-26.698	6.485	0.487	0.062	-3.98662	1.19896	1.66007	583	4318	2281	204	926	1402	129	491	58	208	254	100	233	<LOQ	493	43	75	3	97	8	14	5	18	<LOQ	2	<LOQ	1	<LOQ	<LOQ	<LOQ
L2	Linden	Monofloral	Partial	0	0	0	0.912	0	0	1.65924	0.0559018	-0.455358	-26.93	6.02	0.53	0.07	0.381295	-2.3748	0.137862	2834	1733	2619	2488	1913	195	1020	300	47	923	306	468	372	4	7	137	34	32	196	16	46	26	46	<LOQ	2	1	3	<LOQ	<LOQ	<LOQ
L3	Linden	Monofloral	Full	0	0.112	0	0.368	0.032	0.036	0.445776	-0.938138	-0.550812	-26.421	4.783	0.497	0.079	-2.53826	0.932812	0.885222	851	4529	2626	476	1587	1354	277	883	313	210	292	122	257	28	172	83	108	10	103	9	12	16	18	<LOQ	3	<LOQ	1	4	<LOQ	<LOQ
R1	Rapeseed	Monofloral	Full	0	0.024	0	0	0.888	0	1.30827	-0.276764	-0.324872	-26.842	5.991	0.516	0.072	-0.00223666	-1.98424	-1.39283	1819	4966	2510	1734	1305	315	998	721	128	715	398	495	451	32	95	124	58	69	106	53	64	47	29	2	6	1	1	3	<LOQ	<LOQ
R2	Rapeseed	Monofloral	Full	0	0.036	0	0.026	0.828	0.022	Outliner			-27.33	3.012	0.467	0.052	-1.98718	-0.0512936	0.398691	1711	4780	1799	1402	1560	311	727	488	78	766	295	242	311	5	74	56	48	9	77	48	10	10	37	36	<LOQ	1	1	11	<LOQ	<LOQ
R3	Rapeseed	Monofloral	Partial	0	0	0	0	0.716	0	2.52555	1.98891	-0.667892	-27.991	5.332	0.571	0.062	1.36287	-0.33026	-2.105	1371	7052	3077	2069	2201	198	1026	535	120	689	445	86	441	10	4	105	23	24	145	148	27	22	39	<LOQ	9	5	2	13	<LOQ	<LOQ
R4	Rapeseed	Monofloral	Partial	0	0	0	0	0.75	0	2.05596	1.98707	-0.429621	-28.028	5.327	0.566	0.069	0.454967	-0.522106	-0.536179	2060	6110	1976	2379	1031	236	1194	565	107	729	500	154	434	65	6	96	39	14	168	83	21	11	38	<LOQ	2	2	2	6	<LOQ	<LOQ
W1	Willow	Monofloral	Full	0.06	0	0	0	0.28	0.52	Outliner			-28.287	7.111	0.656	0.042	-1.75926	-0.625556	-2.88035	8838	13175	3553	563	744	580	442	835	95	262	372	108	361	235	7	120	76	103	146	57	41	116	12	1	2	<LOQ	2	<LOQ	<LOQ	2
W2	Willow	Monofloral	Full	0.04	0.056	0	0	0.088	0.644	0.0159782	0.0832294	1.08656	-27.499	7.258	0.494	0.091	6.30333	2.18739	0.246486	9260	4947	6710	1388	3918	1280	1355	1138	154	1777	915	100	898	341	66	294	129	11	124	69	15	6	18	16	10	1	3	<LOQ	1	<LOQ
W3	Willow	Monofloral	Full	0	0.296	0	0	0	0.544	2.02137	0.105162	-0.944972	-26.96	5.11	0.53	0.06	2.34796	-1.08978	-1.46244	2161	10533	3387	703	3416	387	382	1077	122	1002	753	161	641	<LOQ	5	285	202	41	97	46	15	49	43	<LOQ	4	5	4	<LOQ	3	<LOQ
P1	Polyfloral	Polyfloral	Full	0.072	0.2	0	0.044	0.104	0	-1.3348	-0.0563707	-0.498532	-27.083	1.835	0.484	0.096	-1.81458	1.3485	0.596467	3190	3611	2799	438	1397	685	475	1276	54	276	502	82	599	37	381	97	51	24	72	27	15	20	21	<LOQ	1	<LOQ	1	<LOQ	<LOQ	<LOQ
P2	Polyfloral	Polyfloral	Partial	0.008	0	0.24	0	0	0	Outliner			-28.961	-1.19	0.528	0.076	-2.10275	0.617602	1.02672	1937	1225	1978	970	1607	948	506	681	55	458	324	117	305	25	16	101	80	14	95	17	22	11	22	2	2	2	2	3	<LOQ	<LOQ
P3	Polyfloral	Polyfloral	Partial	0.022	0	0.308	0	0	0	-2.41575	1.36919	-0.834859	-27.998	-1.553	0.487	0.103	-4.17245	1.63857	0.116495	4917	4511	2008	355	686	458	169	1100	27	160	207	28	352	9	118	161	47	9	92	<LOQ	12	12	16	<LOQ	1	<LOQ	<LOQ	<LOQ	<LOQ	<LOQ
P4	Polyfloral	Polyfloral	Partial	0	0	0	0.04	0	0	0.645527	-0.176669	-0.506413	-27.0011	4.4296	0.503046	0.074255	0.556565	-0.194962	-0.0612304	1820	5481	2961	1077	2306	796	612	898	165	992	577	133	575	47	306	225	80	27	118	38	28	32	17	8	4	1	1	<LOQ	<LOQ	<LOQ
P5	Polyfloral	Polyfloral	Partial	0.17	0	0	0	0	0	Outliner			-29.617	6.2287	0.469204	0.097706	0.100937	4.23652	0.101677	15250	2139	5394	764	925	1285	929	862	72	274	447	33	452	649	33	106	71	19	118	57	23	16	19	21	10	1	2	<LOQ	<LOQ	<LOQ
P6	Polyfloral	Polyfloral	Partial	0.08	0	0.104	0	0	0	-2.40522	0.945601	-0.740016	-27.873	-1.183	0.474	0.1	-2.45947	0.808737	0.329974	3286	4138	2010	860	1374	405	439	1049	35	216	344	83	319	<LOQ	49	146	62	10	85	35	13	12	33	<LOQ	1	1	2	<LOQ	1	<LOQ
P7	Polyfloral	Polyfloral	Full	0.036	0.184	0	0	0.084	0.196	0.860631	1.08173	0.204529	-27.738	5.782	0.531	0.082	Outliner			10696	6010	4612	1371	1949	1078	982	924	1695	828	774	329	774	159	57	496	70	48	223	160	46	32	44	<LOQ	11	1	2	22	<LOQ	<LOQ
P8	Polyfloral	Polyfloral	Full	0	0.168	0.352	0	0	0	Outliner			-27.75	-5.82	0.54	0.1	Outliner			2858	4553	2920	395	1793	617	197	1845	101	167	414	17	849	<LOQ	116	107	68	6	112	11	9	5	48	<LOQ	1	<LOQ	1	<LOQ	<LOQ	<LOQ
P9	Polyfloral	Polyfloral	Full	0	0	0	0.068	0.696	0.052	2.16823	0.543278	-0.233199	-27.409	6.639	0.533	0.062	-1.73521	-0.677561	0.0658728	1809	4281	2022	1135	1672	309	481	546	40	896	379	191	347	21	158	159	30	23	149	8	30	27	18	18	2	<LOQ	1	<LOQ	<LOQ	<LOQ
P10	Polyfloral	Polyfloral	Full	0	0.044	0	0	0.598	0.152	0.651542	-0.607613	0.0240266	-27.1	5.632	0.48	0.07	-0.0680197	-1.4408	0.884032	2147	7850	2147	1877	1763	969	849	1106	127	818	324	102	313	15	31	169	131	19	170	36	25	17	35	19	1	4	3	<LOQ	<LOQ	<LOQ
P11	Polyfloral	Polyfloral	Full	0.032	0.076	0	0	0.528	0.172	-0.387949	-2.41722	0.290227	-26.204	6.018	0.434	0.078	-1.65228	0.238938	2.38208	1868	2842	1311	1036	810	1487	580	1590	173	420	233	77	268	20	52	146	164	13	114	37	16	12	19	2	5	1	3	4	<LOQ	<LOQ
P12	Polyfloral	Polyfloral	Partial	0	0	0	0.026	0	0	0.636288	-1.48783	0.504197	-26.76	7.25	0.46	0.07	-1.35883	-1.56762	-0.109866	1894	2098	2230	1550	1834	344	855	663	114	578	359	136	316	32	212	202	34	74	123	18	39	65	27	<LOQ	<LOQ	1	2	<LOQ	<LOQ	<LOQ
P13	Polyfloral	Polyfloral	Full	0	0.048	0	0	0.268	0.392	1.13153	-0.267766	0.356915	-27.202	7.068	0.499	0.072	1.77814	0.215847	3.64151	3479	1587	2782	1333	2154	2914	697	1768	188	568	600	122	569	75	39	241	297	15	130	37	21	16	25	7	3	1	3	9	1	<LOQ
P14	Polyfloral	Polyfloral	Partial	0.04	0	0.38	0	0	0	-3.2358	0.346374	-1.41045	-27.394	-3.458	0.458	0.104	-2.58673	-2.22932	-2.0516	3045	7867	2298	575	1591	555	244	1845	66	270	296	41	426	<LOQ	121	319	64	108	129	10	27	110	69	<LOQ	2	1	1	<LOQ	<LOQ	<LOQ
P15	Polyfloral	Polyfloral	Full	0.12	0.04	0	0	0.58	0.108	-0.958631	-0.0835922	0.437105	-27.147	4.758	0.491	0.101	0.319631	0.307308	0.578252	5612	2731	2504	1712	1298	819	1206	767	177	602	499	132	457	96	21	169	102	30	116	52	25	28	22	4	1	1	2	<LOQ	<LOQ	<LOQ
P16	Polyfloral	Polyfloral	Partial	0	0	0	0	0.336	0	-0.328196	0.497827	0.103705	-27.61	4.063	0.496	0.087	1.99002	0.5591	-0.486146	4289	8346	2963	1564	2297	726	925	1266	59	674	750	171	668	10	38	97	128	8	101	86	20	7	36	<LOQ	6	1	2	<LOQ	<LOQ	<LOQ
P17	Polyfloral	Polyfloral	Partial	0.126	0	0.012	0	0	0	-0.224099	-0.418166	0.323662	-26.99	5.55	0.49	0.09	4.33593	-0.934537	0.7896	6259	3057	3198	2087	2177	914	1536	1035	104	989	657	385	652	<LOQ	53	121	193	18	172	138	33	16	36	1	7	4	4	<LOQ	<LOQ	<LOQ
P18	Polyfloral	Polyfloral	Partial	0.07	0	0.224	0	0	0	Outliner			-28.579	-2.964	0.531	0.074	0.595573	0.0156996	-0.0162362	3689	6495	2887	1812	1708	638	866	1889	107	327	605	140	534	11	56	287	97	4	124	77	18	4	54	<LOQ	<LOQ	2	1	<LOQ	<LOQ	<LOQ
P19	Polyfloral	Polyfloral	Partial	0	0	0	0.056	0.008	0	-0.860901	-0.246701	0.285627	-27.2899	4.2103	0.473712	0.090924	3.75202	-0.578585	1.7543	5247	3849	4149	2173	2863	1255	1346	836	149	1183	626	455	543	80	483	198	164	9	183	91	22	9	23	<LOQ	6	1	2	7	<LOQ	<LOQ
P20	Polyfloral	Polyfloral	Partial	0.126	0	0.012	0	0	0	Outliner			-28.87	-0.62	0.59	0.062	Outliner			3752	6255	3639	2193	1988	670	659	1504	50	301	1288	58	1198	<LOQ	41	205	67	35	78	39	37	68	79	<LOQ	1	<LOQ	2	7	<LOQ	<LOQ
P21	Polyfloral	Polyfloral	Full	0	0.06	0	0.096	0.352	0.032	0.168054	-2.21464	0.0479584	-26.052	6.346	0.457	0.077	-1.83635	-3.07435	2.99343	1220	2039	1583	823	776	2798	387	1836	69	362	277	86	303	22	283	134	218	127	173	20	75	63	22	29	3	<LOQ	3	<LOQ	<LOQ	<LOQ
P22	Polyfloral	Polyfloral	Full	0.136	0.23	0	0	0	0.112	1.09531	-0.2167	-0.327542	-26.856	5.705	0.516	0.075	-1.29208	-1.66967	-1.60658	2711	2312	2122	851	1830	217	492	749	220	658	388	59	408	39	5	182	46	75	124	39	50	114	14	<LOQ	<LOQ	3	2	5	1	5
P23	Polyfloral	Polyfloral	Full	0	0.064	0	0	0.672	0.052	Outliner			-28.881	3.904	0.682	0.031	0.776751	-4.38666	-1.77184	2521	2877	2483	1426	2490	310	658	521	49	1244	525	494	500	59	7	175	32	93	210	15	74	108	51	52	7	1	2	4	<LOQ	3
P24	Polyfloral	Polyfloral	Partial	0	0	0	0.036	0	0	Outliner			-28.889	3.331	0.635	0.028	3.87426	-1.74642	1.38962	2584	2430	4454	1865	4136	1033	895	664	117	1566	621	243	546	<LOQ	352	346	139	23	212	50	35	16	31	13	6	1	3	9	<LOQ	<LOQ
P25	Polyfloral	Polyfloral	Full	0	0.144	0	0	0.6	0.076	0.411778	0.908503	-0.507895	-27.328	3.867	0.536	0.087	-0.301414	-1.67019	-0.129808	2842	1603	1768	1899	1458	459	1063	789	65	724	350	222	372	<LOQ	21	82	210	60	112	39	29	55	57	4	5	6	2	<LOQ	<LOQ	<LOQ
P26	Polyfloral	Polyfloral	Full	0	0	0	0	0.688	0.076	Outliner			-28.337	5.253	0.572	0.046	Outliner			1914	4003	2806	1204	2033	857	1047	1097	405	990	584	103	758	14	503	382	86	287	99	93	124	84	29	56	17	<LOQ	3	<LOQ	<LOQ	<LOQ
P27	Polyfloral	Polyfloral	Full	0	0.252	0	0	0.38	0.1	-0.921675	-1.02331	-0.378967	-26.5816	3.2453	0.470505	0.08997	1.53569	-1.38218	3.67783	2160	2236	2107	2352	1962	1391	1347	1077	136	676	384	204	429	19	235	185	177	11	144	93	25	6	28	60	2	1	4	7	1	<LOQ
P28	Polyfloral	Polyfloral	Full	0	0.208	0	0.068	0	0.172	-0.0732713	-2.38174	0.184235	-25.891	6.623	0.457	0.083	-2.91563	-0.462048	2.106	1178	1614	1211	1046	1313	791	654	780	47	250	255	38	230	21	273	81	56	7	165	17	19	5	18	68	2	6	2	<LOQ	4	9
P29	Polyfloral	Polyfloral	Full	0	0.104	0	0.07	0.124	0.084	-0.481544	-0.438454	-0.0828563	-26.869	4.298	0.49	0.091	Outliner			2853	4065	2567	4604	1927	1482	2481	1357	1748	439	615	1216	595	<LOQ	133	146	267	15	118	77	20	15	78	2	2	2	3	13	<LOQ	<LOQ
P30	Polyfloral	Polyfloral	Full	0	0.044	0	0	0.552	0.052	-0.278547	-0.625276	-0.135992	-26.722	4.597	0.491	0.089	1.91857	-2.35524	1.36507	2890	2728	2179	2546	1545	650	1499	964	60	640	406	362	424	<LOQ	142	190	198	47	105	132	55	45	42	1	1	1	4	<LOQ	<LOQ	<LOQ
P31	Polyfloral	Polyfloral	Full	0	0	0	0	0.532	0.356	0.370735	0.894306	-0.874356	-27.6966	2.2403	0.509281	0.071934	-1.7359	0.411531	-2.85923	1113	7076	1222	842	1316	276	450	569	53	441	288	52	280	10	4	56	41	25	82	81	13	32	25	1	14	16	2	16	<LOQ	<LOQ
P32	Polyfloral	Polyfloral	Full	0	0.052	0	0.092	0.492	0.06	0.921265	0.142001	-0.299833	-26.917	5.546	0.529	0.082	0.406441	-0.792157	1.5223	1229	4260	1835	2611	1339	619	1505	818	152	570	370	111	523	7	369	67	70	33	107	58	22	31	19	1	1	1	3	<LOQ	<LOQ	<LOQ
P33	Polyfloral	Polyfloral	Partial	0	0	0	0	0	0	Outliner			-28.909	5.529	0.727	0.016	-1.01407	-0.858384	0.617467	1923	1946	1794	1679	1516	235	812	552	35	977	302	465	324	7	4	72	25	27	84	33	18	11	44	<LOQ	<LOQ	1	3	<LOQ	<LOQ	<LOQ
P34	Polyfloral	Polyfloral	Full	0	0.1	0	0.076	0.324	0.044	0.642477	-0.572665	-0.0433654	-26.754	5.982	0.502	0.08	-0.712809	-0.533797	1.85817	1683	4100	2083	1906	1452	636	893	881	61	572	402	244	397	28	674	111	75	39	85	73	19	15	20	9	1	1	2	<LOQ	<LOQ	<LOQ
P35	Polyfloral	Polyfloral	Full	0.04	0.048	0	0	0.4	0.084	0.0809346	0.452222	0.779387	-27.609	6.416	0.504	0.09	0.931514	-1.505	-1.55672	6725	4709	2941	1847	1127	585	1317	712	225	738	569	408	558	<LOQ	5	111	104	91	102	54	40	84	28	12	4	2	1	10	<LOQ	<LOQ
P36	Polyfloral	Polyfloral	Full	0	0.196	0	0	0.076	0.416	0.252258	-1.08038	0.167526	-26.64	6.123	0.481	0.081	3.74568	-2.4678	-3.67963	2250	9137	3290	2038	1889	379	1013	1041	570	465	711	219	651	29	29	153	83	81	168	187	70	55	46	<LOQ	8	4	2	<LOQ	2	<LOQ
P37	Polyfloral	Polyfloral	Partial	0	0	0	0.012	0	0	0.0516302	0.412125	-0.6003	-27.3031	3.0836	0.507772	0.081543	Outliner			1987	5720	1423	1439	2142	507	798	801	104	564	439	110	394	<LOQ	48	100	50	74	85	42	28	81	42	<LOQ	44	4	1	<LOQ	3	<LOQ
P38	Polyfloral	Polyfloral	Partial	0	0	0	0.034	0	0	0.835923	0.0246958	-0.0458303	-27.189	5.681	0.508	0.076	-1.07284	-0.0994869	1.24243	1168	3025	1316	830	1061	1202	489	652	263	646	283	80	425	26	230	303	74	13	152	30	19	13	15	35	10	<LOQ	2	<LOQ	<LOQ	<LOQ
P39	Polyfloral	Polyfloral	Partial	0	0	0	0.008	0	0	-0.536804	0.210489	-0.0856884	-27.3259	3.6576	0.494743	0.090037	0.891941	-1.35511	-1.43045	3837	5416	2496	1362	1404	487	807	845	225	555	624	141	556	<LOQ	45	185	65	44	149	72	74	36	29	1	4	1	2	<LOQ	<LOQ	<LOQ
P40	Polyfloral	Polyfloral	Partial	0.13	0	0	0	0	0	-0.504156	-0.978649	0.634532	-26.7589	6.2734	0.475426	0.093472	3.2096	-0.319344	-0.0079648	5353	4243	3316	1738	1739	867	1220	1022	151	576	632	222	635	6	7	354	135	22	157	161	35	20	24	2	5	2	3	<LOQ	<LOQ	<LOQ
P41	Polyfloral	Polyfloral	Full	0	0.112	0	0	0.236	0.404	1.10749	0.275117	-0.967199	-27.16	3.6162	0.516984	0.067064	2.36904	-0.808001	-4.21993	1951	9892	3374	1062	1922	265	570	845	350	612	706	119	722	32	35	151	96	37	157	128	50	22	35	<LOQ	8	14	1	11	1	3
P42	Polyfloral	Polyfloral	Full	0.24	0.104	0	0	0.548	0	Outliner			-29.643	7.435	0.489	0.111	-0.233038	6.19578	-1.13891	19816	1419	8845	611	1186	992	690	459	36	385	467	27	443	696	8	96	43	10	108	53	13	10	28	<LOQ	5	<LOQ	<LOQ	<LOQ	<LOQ	<LOQ
P43	Polyfloral	Polyfloral	Full	0	0.086	0	0	0.308	0.314	-0.474246	-0.122457	-0.655502	-26.753	2.998	0.508	0.093	Outliner			2022	4196	1233	1354	1255	460	504	786	45	594	342	130	297	<LOQ	4	96	41	25	147	<LOQ	29	37	97	12	32	1	2	<LOQ	<LOQ	<LOQ
P44	Polyfloral	Polyfloral	Full	0	0	0	0.034	0.564	0.044	2.86414	1.55634	-0.545645	-27.885	6.162	0.56	0.055	-3.08109	-1.5632	0.168208	1375	2093	1450	1082	1386	430	564	606	32	454	227	255	204	10	156	88	53	50	121	20	37	74	29	43	5	<LOQ	1	<LOQ	<LOQ	<LOQ
P45	Polyfloral	Polyfloral	Full	0	0.096	0	0.12	0.272	0	1.49908	-1.33323	-0.0648319	-26.29	7.56	0.5	0.07	-2.47797	-2.42912	0.0310591	944	5444	1780	1036	1156	716	601	875	63	325	296	310	263	92	186	183	60	66	154	11	41	104	23	30	1	<LOQ	2	<LOQ	<LOQ	<LOQ
P46	Polyfloral	Polyfloral	Full	0	0.036	0.064	0	0.184	0.192	-0.420022	-1.6107	-0.805465	-26.085	3.358	0.472	0.083	Outliner			3251	11079	3491	564	2312	3278	195	1374	59	986	351	65	340	23	29	173	217	96	205	40	81	45	28	1	1	1	3	<LOQ	<LOQ	<LOQ
P47	Polyfloral	Polyfloral	Full	0	0.12	0	0	0.284	0.412	Outliner			-28.925	6.347	0.688	0.033	-2.77189	-0.629881	-2.01109	1548	3239	1443	1099	1244	141	472	393	69	369	295	133	290	29	13	87	17	47	117	22	25	65	40	<LOQ	6	6	1	6	<LOQ	<LOQ
P48	Polyfloral	Polyfloral	Full	0	0	0	0	0.204	0	-0.856936	-2.94433	-0.363092	-25.469	4.663	0.441	0.087	0.0813525	-1.12632	5.01671	2164	1117	1412	1288	954	2947	948	2034	225	419	283	288	330	32	12	130	425	23	134	28	37	23	16	1	<LOQ	1	3	<LOQ	<LOQ	3
P49	Polyfloral	Polyfloral	Full	0.04	0.088	0	0.06	0.516	0.036	-0.738341	-1.22952	0.477143	-26.641	5.673	0.466	0.093	1.58258	-2.0236	0.691395	5055	3935	2878	2377	1405	1105	1208	836	283	873	386	485	445	73	163	152	145	44	202	49	34	48	33	<LOQ	3	1	2	5	<LOQ	<LOQ
P50	Polyfloral	Polyfloral	Full	0.084	0.068	0	0.104	0.312	0.056	-1.10435	-0.773679	0.733263	-27	5.452	0.466	0.098	3.97607	-0.880419	0.720295	6375	3911	3740	2642	2125	1198	1591	1183	212	550	701	456	691	68	220	177	172	41	142	117	42	27	26	2	5	1	2	<LOQ	<LOQ	<LOQ
P51	Polyfloral	Polyfloral	Partial	0.156	0	0	0	0	0	-0.0949253	1.02187	1.727	-28.43	7.63	0.49	0.09	-0.530532	1.95292	-1.03546	8056	1671	4297	978	1331	729	751	197	266	347	492	148	515	9	5	83	64	29	67	38	25	27	13	3	5	3	1	10	<LOQ	<LOQ
P52	Polyfloral	Polyfloral	Full	0.036	0.07	0	0	0.676	0.04	-1.11374	0.831356	1.64022	-28.283	6.284	0.478	0.101	-0.554754	1.15023	-1.23847	10115	4315	4029	996	1118	720	853	594	70	530	435	91	429	85	39	75	83	63	99	84	41	45	15	<LOQ	5	1	1	<LOQ	<LOQ	<LOQ
P53	Polyfloral	Polyfloral	Partial	0	0	0	0.012	0	0	0.0946082	-0.614728	-0.404309	-26.44	4.78	0.51	0.09	Outliner			2209	3933	2213	1644	1748	744	972	1163	414	505	565	141	454	12	230	201	121	157	118	36	118	60	38	29	2	3	3	18	2	4
P54	Polyfloral	Polyfloral	Partial	0.036	0	0.006	0	0	0	-0.123087	0.630369	1.78743	-28.188	8.046	0.485	0.091	-1.16789	2.86087	0.198394	10244	4020	3382	1031	1065	774	628	601	35	334	517	81	458	193	2	160	51	3	59	33	8	2	27	1	1	<LOQ	2	<LOQ	<LOQ	<LOQ
P55	Polyfloral	Polyfloral	Full	0.06	0.172	0.044	0	0.12	0.372	-2.13579	1.56779	-0.557298	-28.27	-0.818	0.486	0.099	-1.47467	0.433677	-0.0967662	3443	4860	2303	837	1263	423	420	1091	31	233	472	70	555	<LOQ	41	184	39	12	141	25	26	10	25	<LOQ	<LOQ	1	2	<LOQ	<LOQ	<LOQ
[truncated: 556 more columns]

## Sheet: Loadings
Variable	IRMS PC1	IRMS PC2	IRMS PC3		Variable	UHPLC-HRMS PC1	UHPLC-HRMS PC2	UHPLC-HRMS PC3		Bin interval	NMR PC1	NMR PC2	NMR PC3
δ13C, ‰	0.122656	-0.813762	-0.401009		3,4-Dihydroxybenzoic acid	0.0824654	0.0838039	0.426553		0.5	0.025471	-0.000735	0.027328
δ15N, ‰	0.502973	-0.245081	0.812991		Abscisic acid	0.0367611	-0.112427	-0.349447		0.51	0.029651	-0.005518	0.036309
C, %	0.532543	0.520737	-0.291529		Acacetin	0.124475	-0.269179	0.000773442		0.52	0.029731	-0.0143	0.028766
N, %	-0.669606	0.080993	0.305366		Apigenin	0.0497208	-0.059559	-0.254981		0.53	0.030475	-0.002342	0.031108
					Caffeic acid	0.375109	0.0728402	-0.130753		0.54	0.029637	-0.01028	0.042521
					Chlorogenic acid	0.322435	0.0513544	-0.12833		0.55	0.027535	-0.005756	0.031781
					Daidzein	-0.0767111	-0.267369	-0.239908		0.56	0.019943	-0.015622	0.037588
					Epicatechin	0.153166	0.118043	-0.205866		0.57	0.031312	-0.011128	0.024448
					Ferulic acid	0.290316	-0.088364	-0.0147756		0.58	0.031248	-0.007668	0.026563
					Galangin	-0.0394344	-0.28889	-0.20518		0.59	0.025823	-0.016429	0.017659
					Gallic acid	0.179107	-0.0985262	0.307472		0.6	0.028717	-0.009407	0.028573
					Genistein	0.118584	-0.0776418	-0.0047356		0.61	0.020329	-0.007995	0.037139
					Isovitexin	-0.0601882	-0.121421	0.175783		0.62	0.029566	0.004206	0.03552
					Kaempferol	0.256553	-0.189174	0.134774		0.63	0.022549	-0.008782	0.037435
					Luteolin	0.198628	-0.0522753	-0.119587		0.64	0.030601	0.000693	0.037731
					Myricetin	0.219244	-0.126046	0.277294		0.65	0.018983	-0.011532	0.03764
					o-Coumaric acid	-0.0302468	-0.0735809	0.266786		0.66	0.032364	-0.02879	0.040829
					Pantothenic acid (B5)	0.0325624	-0.0632717	0.21122		0.67	0.016179	-0.01315	0.059858
					p-Coumaric acid	0.205165	0.339005	-0.121083		0.68	0.031862	-0.018255	0.030575
					Phenylacetic acid	0.360518	0.0545905	-0.119658		0.69	0.032438	-0.018522	0.011077
					p-Hydroxybenzoic acid	0.110847	0.388533	-0.0810621		0.7	0.026803	0.000491	0.049865
					Quercetin	0.332577	0.000517517	0.140754		0.71	0.018303	0.008274	0.019446
					Rhamnetin	0.0753972	-0.316437	-0.134612		0.72	0.031148	-0.002024	0.030618
					Rutin	0.0945859	0.382209	-0.0344192		0.73	0.037502	0.015089	0.029403
					Sinapic acid	-0.011188	-0.158704	-0.163582		0.74	0.018746	-0.007991	0.038288
					Syringic acid	0.143706	-0.258374	0.0204163		0.75	0.014439	0.004456	0.034796
					Vanillic acid	0.280321	-0.135559	0.0515229		0.76	0.029672	0.001213	0.046331
										0.77	0.035218	-0.022386	0.02353
										0.78	0.015253	0.003621	0.018885
										0.79	0.02426	-0.004701	0.014947
										0.8	0.030843	0.002497	0.044124
										0.81	0.010909	-0.000877	0.025535
										0.82	0.002046	0.013491	0.025672
										0.83	-0.02275	-0.000764	0.042022
										0.84	-0.027155	-0.008538	0.001589
										0.85	0.009422	-0.004744	0.035232
										0.86	0.012683	0.011274	0.000864
										0.87	0.026633	-0.015312	0.033815
										0.88	-0.014548	-0.003006	0.006529
										0.89	-0.021401	-0.007433	0.006635
										0.9	-0.031034	-0.016546	0.013614
										0.91	-0.016937	-0.009474	0.020123
										0.92	-0.091521	-0.017753	0.010293
										0.93	-0.087305	-0.011299	0.005054
										0.94	-0.079988	-0.01064	0.009674
										0.95	-0.084348	-0.001502	0.00857
										0.96	-0.104509	-0.013658	0.010592
										0.97	-0.088859	-0.00488	0.007429
										0.98	-0.114074	-0.011673	0.003038
										0.99	-0.122496	-0.018897	0.007545
										1	-0.121323	-0.013124	0.004753
										1.01	-0.122047	-0.015709	0.004609
										1.02	-0.123243	-0.019351	0.007009
										1.03	-0.123103	-0.01859	0.008234
										1.04	-0.122597	-0.018807	0.008626
										1.05	-0.121918	-0.018686	0.008823
										1.06	-0.121604	-0.017088	0.008404
										1.07	-0.11873	-0.01411	0.006639
										1.08	-0.121516	-0.018705	0.006591
										1.09	-0.118705	-0.014791	0.005621
										1.1	-0.118741	-0.022747	0.012318
										1.11	-0.090901	-0.054357	0.058168
										1.12	0.016856	-0.074056	0.09928
										1.13	-0.072896	-0.04678	0.048402
										1.14	-0.080849	-0.049913	0.055951
										1.15	0.035068	-0.07386	0.099759
										1.16	0.035233	-0.071062	0.096391
										1.17	0.011684	0.016122	-0.005443
										1.18	-0.019521	0.00249	-0.027895
										1.19	0.006969	0.03206	-0.016464
										1.2	0.010161	-0.027723	-0.052153
										1.21	0.009036	-0.063382	-0.004241
										1.22	0.033579	-0.069419	0.01754
										1.23	0.029895	-0.072293	0.047086
										1.24	0.029866	-0.062761	0.050636
										1.25	0.032738	-0.067409	0.047419
										1.26	0.028853	-0.06358	0.051943
										1.27	0.030562	-0.062786	0.05123
										1.28	0.030759	-0.0733	0.049259
										1.29	0.030625	-0.067042	0.045683
										1.3	0.027654	-0.073386	0.032278
										1.31	0.022282	-0.07798	0.042764
										1.32	0.017561	-0.075312	0.052368
										1.33	-0.001721	-0.101306	0.04826
										1.34	-0.005612	-0.090073	0.048555
										1.35	-0.042406	-0.088381	0.047715
										1.36	-0.049427	-0.085469	0.048278
										1.37	-0.063145	-0.087203	0.037389
										1.38	-0.054786	-0.089477	0.024604
										1.39	-0.047377	-0.083375	0.003279
										1.4	-0.052747	-0.094401	0.002873
										1.41	-0.033167	-0.092846	-0.014199
										1.42	-0.038043	-0.097088	-0.03108
										1.43	-0.037013	-0.083213	-0.042278
										1.44	0.000456	-0.067505	-0.032207
										1.45	0.017312	-0.068481	-0.059826
										1.46	0.029182	-0.07444	-0.098199
										1.47	0.033113	-0.068598	-0.091382
										1.48	0.006645	-0.049473	-0.060306
										1.49	-0.009319	-0.085562	-0.063582
										1.5	-0.019156	-0.064626	-0.017602
										1.51	-0.049272	-0.030086	-0.010223
										1.52	-0.037461	-0.001233	-0.013598
										1.53	-0.061871	-0.01921	0.002942
										1.54	-0.052072	-0.007971	-0.005358
										1.55	-0.043936	-0.038528	0.020919
										1.56	-0.087841	-0.017522	0.015462
										1.57	-0.047117	-0.00854	-0.001335
										1.58	-0.075619	-0.023354	0.032851
										1.59	-0.043399	0.008332	-0.008691
										1.6	-0.064388	0.000619	-0.013457
										1.61	-0.025221	0.00026	-0.00836
										1.62	-0.036523	0.009824	-0.014575
										1.63	-0.01533	0.021457	-0.017416
										1.64	-0.023186	0.016578	-0.017185
										1.65	-0.023307	0.008955	-0.010627
										1.66	0.005218	-0.027388	-0.073737
										1.67	0.036991	-0.053097	-0.096096
										1.68	0.039372	-0.037746	-0.086684
										1.69	0.034148	0.011136	-0.032475
										1.7	0.011819	0.013395	-0.024712
										1.71	0.014214	0.034111	-0.025855
										1.72	0.009033	0.022793	-0.01462
										1.73	-0.02174	0.012571	-0.027498
										1.74	-0.03511	0.015093	-0.017505
										1.75	-0.053641	0.00609	-0.018097
										1.76	-0.110978	-0.010471	-0.002453
										1.77	-0.113565	-0.010856	-0.005575
										1.78	-0.120444	-0.014133	0.001535
										1.79	-0.12208	-0.014814	0.005263
										1.8	-0.122844	-0.015799	0.00635
										1.81	-0.122536	-0.017384	0.005415
										1.82	-0.118483	-0.014428	0.001179
										1.83	-0.116111	-0.022614	-0.009724
										1.84	-0.115985	-0.02343	-0.000207
										1.85	-0.105699	-0.009287	-0.00021
										1.86	-0.100945	-0.007512	-0.003524
										1.87	-0.107458	-0.010713	0.002975
										1.88	-0.098003	-0.030045	0.021356
										1.89	-0.083904	-0.039145	0.037328
										1.9	-0.080843	-0.06319	0.017962
										1.91	-0.049828	-0.033123	0.018637
										1.92	-0.054049	-0.048358	0.021146
										1.93	-0.04933	-0.075396	0.02927
										1.94	-0.035799	-0.019804	0.019056
										1.95	-0.000846	0.014657	-0.016445
										1.96	0.011549	0.022358	-0.018465
										1.97	0.022523	0.020898	-0.016112
										1.98	0.016181	-0.013751	0.009294
										1.99	0.032536	-0.028194	0.055741
										2	0.039993	-0.077898	0.092272
										2.01	0.045149	-0.07479	0.099038
										2.02	0.037852	-0.07985	0.098256
										2.03	-0.021884	-0.086747	0.062671
										2.04	-0.049585	-0.06424	0.033412
										2.05	-0.051557	-0.063323	0.042315
										2.06	-0.049972	-0.060004	0.04437
										2.07	-0.053507	-0.054909	0.036807
										2.08	-0.04801	-0.055461	0.035651
										2.09	-0.045597	-0.048758	0.036428
										2.1	-0.043354	-0.048626	0.036909
										2.11	-0.03956	-0.048266	0.039274
										2.12	-0.038377	-0.045075	0.037784
										2.13	-0.037633	-0.054779	0.036485
										2.14	-0.009276	-0.099653	-0.025117
										2.15	0.020457	-0.055568	0.051105
										2.16	0.03013	-0.060035	0.074963
										2.17	-0.03083	-0.013743	0.023532
										2.18	-0.03395	-0.043355	0.031849
										2.19	-0.033605	-0.040333	0.02344
										2.2	-0.015999	-0.012753	-0.023997
										2.21	-0.034472	-0.034741	0.005347
										2.22	-0.004245	-0.05678	0.044225
										2.23	-0.023986	-0.033084	0.002472
										2.24	-0.021858	-0.054752	0.024007
										2.25	-0.00728	-0.024067	-0.04121
										2.26	-0.006615	-0.029665	-0.009333
										2.27	0.025924	-0.00108	-0.011849
										2.28	0.035707	0.020412	-0.044845
										2.29	0.026504	-0.006074	-0.055647
										2.3	-0.006958	-0.004986	-0.036834
										2.31	-0.021448	0.009874	-0.009795
										2.32	-0.017133	0.012337	-0.009168
										2.33	-0.029369	-0.038921	-0.033845
										2.34	0.023292	-0.034879	-0.07415
										2.35	0.016362	-0.047278	-0.052406
										2.36	0.024977	-0.070409	-0.10196
										2.37	0.018346	-0.082991	-0.103661
										2.38	0.018556	-0.091703	-0.083369
										2.39	0.031492	-0.084849	-0.093942
										2.4	0.027768	-0.101171	-0.055256
										2.41	0.029918	-0.10167	-0.073132
										2.42	0.030408	-0.090603	-0.068677
										2.43	0.014542	-0.09102	-0.03467
										2.44	0.048847	-0.103564	-0.053126
										2.45	0.052349	-0.108175	0.050677
										2.46	0.047844	-0.116785	0.015581
										2.47	0.024949	-0.095365	0.002304
										2.48	0.039753	-0.078722	-0.054066
										2.49	0.014701	-0.081312	-0.084984
										2.5	0.003282	-0.078302	-0.08812
										2.51	0.023308	-0.080542	-0.104758
										2.52	0.017385	-0.080841	-0.103753
										2.53	0.021254	-0.077809	-0.104733
										2.54	0.016696	-0.082641	-0.104385
										2.55	0.018818	-0.077905	-0.10381
										2.56	0.024631	-0.071265	-0.102246
										2.57	0.022236	-0.083039	-0.101019
										2.58	-0.029456	-0.076445	-0.074298
										2.59	0.007018	-0.058152	-0.083736
										2.6	0.016966	-0.044391	-0.040379
										2.61	0.02834	0.02047	-0.003934
										2.62	0.011377	0.033463	-0.01671
										2.63	0.018237	0.012963	-0.014759
										2.64	0.00227	0.008704	0.005805
										2.65	-0.002772	0.001863	0.007193
										2.66	0.009694	0.004459	0.010075
										2.67	-0.060038	-0.003884	0.011085
										2.68	-0.016606	-0.024013	-0.060753
										2.69	0.019827	-0.01075	0.008138
										2.7	0.026199	0.020121	-0.011279
										2.71	0.037847	0.002542	0.018351
										2.72	0.007785	0.018338	0.009525
										2.73	0.00401	0.010971	-0.006675
										2.74	0.037369	-0.019079	0.044917
										2.75	0.030851	0.012056	0.008788
										2.76	0.024308	0.02527	-0.011267
										2.77	0.015303	0.022366	-0.005432
										2.78	0.024079	0.013351	-0.011324
										2.79	0.017766	0.025788	-0.006987
										2.8	0.024295	0.004765	0.017328
										2.81	0.039696	0.011944	0.00847
										2.82	0.019872	0.002573	0.016718
										2.83	0.007567	0.007691	0.00075
										2.84	0.005159	0.008611	-0.012228
										2.85	0.021855	0.015858	-0.012813
										2.86	0.027992	0.027714	-0.013618
										2.87	0.025721	0.014289	-0.003815
										2.88	0.025133	0.014269	-0.00738
										2.89	0.014293	0.019351	-0.003321
										2.9	0.02712	0.016411	0.005536
										2.91	0.014183	0.014592	0.00209
										2.92	0.006945	0.024862	-0.006632
										2.93	0.011016	0.028855	-0.004816
										2.94	0.015418	0.024366	-0.007272
										2.95	0.025534	0.029999	-0.001654
										2.96	0.028892	0.01648	0.014005
										2.97	0.02074	-0.01346	0.048208
										2.98	0.013709	-0.031131	0.054838
										2.99	0.024603	-0.028612	0.043271
										3	0.024773	-0.046003	0.07569
										6	0.013276	-0.024566	0.007675
										6.01	-0.016619	-0.027839	-0.003382
										6.02	0.012006	0.007129	-0.016282
										6.03	-0.02154	-0.016242	0.021916
										6.04	0.00126	-0.050881	0.037137
										6.05	0.03022	-0.059432	-0.030118
										6.06	-0.011959	-0.010142	0.011668
										6.07	0.003021	-0.008549	-0.013104
										6.08	-0.012447	-0.044666	-0.033702
										6.09	0.004736	-0.00346	0.000881
										6.1	0.016468	-0.050704	-0.027928
										6.11	0.002523	0.011425	-0.008856
										6.12	-0.02964	-0.005291	-0.00316
										6.13	0.005392	-0.036795	0.045052
										6.14	0.017005	-0.03585	0.035742
										6.15	0.019548	-0.045808	0.045801
										6.16	0.037041	-0.072528	0.090354
										6.17	0.042828	-0.076188	0.096751
										6.18	0.033089	-0.077908	0.08478
										6.19	-0.01053	-0.066533	-0.023257
										6.2	0.014233	-0.073446	-0.084719
										6.21	0.022593	-0.07721	-0.102004
										6.22	0.025845	-0.067787	-0.092705
										6.23	0.029545	-0.077725	-0.103034
										6.24	0.031578	-0.069822	-0.098717
										6.25	0.031676	-0.075065	-0.100376
										6.26	0.032669	-0.070696	-0.100127
										6.27	0.027464	-0.068906	-0.099585
										6.28	0.026427	-0.059698	-0.095156
										6.29	0.023282	-0.078132	-0.095499
										6.3	0.018872	-0.083701	-0.076178
										6.31	0.019545	-0.075275	-0.080777
										6.32	0.004215	-0.060246	-0.066306
										6.33	0.01254	-0.03966	-0.000341
										6.34	0.011782	-0.022899	-0.010993
										6.35	0.015083	-0.018425	-0.009262
										6.36	0.007369	-0.026642	0.01838
										6.37	0.020688	0.012189	-0.01879
										6.38	0.023959	-0.021261	0.001675
										6.39	-0.005041	-0.008378	-0.013324
										6.4	0.012951	-0.024196	-0.015512
										6.41	0.009776	-0.037219	0.029148
										6.42	-0.006676	0.001479	-0.023897
										6.43	0.004175	-0.026685	-0.021214
										6.44	0.005585	-0.042288	-0.02291
										6.45	0.009925	-0.057289	-0.032401
										6.46	0.013538	-0.037479	-0.056534
										6.47	0.034479	-0.064832	0.042006
										6.48	0.038565	-0.078768	0.094456
										6.49	0.024624	-0.058936	0.021139
										6.5	0.017556	-0.033296	-0.022761
										6.51	0.004187	-0.064962	-0.032079
										6.52	0.027336	-0.061965	0.067802
										6.53	0.040634	-0.076405	0.096116
										6.54	0.035209	-0.066327	0.078473
										6.55	0.016746	-0.03719	0.010858
										6.56	-0.001577	-0.034152	-0.015851
										6.57	0.026812	-0.00974	0.000513
										6.58	-0.012711	-0.008044	-0.007112
										6.59	0.009807	0.011749	0.005091
										6.6	0.004629	-0.028803	0.012184
										6.61	0.025627	-0.03294	0.027663
										6.62	0.026629	-0.010892	-0.03002
										6.63	0.010615	0.005093	-0.012658
										6.64	0.018375	-0.010685	-0.002395
										6.65	-0.060961	-0.03983	0.00353
										6.66	0.020504	-0.0384	-0.016356
										6.67	-0.041628	-0.035248	0.026441
										6.68	4e-05	0.004686	0.015678
										6.69	0.016796	-0.030556	-0.013615
										6.7	0.026806	-0.052195	-0.049782
										6.71	0.023101	-0.040263	-0.037138
										6.72	0.020187	-0.028437	-0.035035
										6.73	0.019318	0.010254	-0.019484
										6.74	0.017039	0.016849	-0.011127
										6.75	0.016085	0.022306	-0.012513
										6.76	0.017091	0.024227	-0.008828
										6.77	0.013647	0.020026	0.000885
										6.78	0.014393	0.015018	0.004053
										6.79	0.004029	0.011047	0.001786
										6.8	-0.004697	0.010655	0.00439
										6.81	0.017001	0.006161	-0.010649
										6.82	0.021558	0.009802	-0.001798
										6.83	0.001233	0.002808	-0.016249
										6.84	0.002566	0.005621	-0.021276
										6.85	-0.006572	-0.009781	0.02886
										6.86	0.019576	-0.054524	0.066435
										6.87	0.035152	-0.049882	0.082213
										6.88	0.003036	-0.023175	0.028943
										6.89	-0.001271	-0.013789	0.003714
										6.9	0.000149	-0.001066	-0.006526
										6.91	-0.002921	-0.010047	-0.010962
										6.92	-0.008076	0.010039	-0.000192
										6.93	0.031522	-0.002363	0.019031
										6.94	0.000773	0.018272	-0.015216
										6.95	-0.074116	-0.025163	-0.013587
										6.96	-0.118904	-0.020572	0.007683
										6.97	-0.121773	-0.018356	0.004869
										6.98	-0.120324	-0.016313	0.005391
										6.99	-0.121018	-0.018424	0.007738
										7	-0.122763	-0.018243	0.007556
										7.01	-0.10608	-0.01235	0.003176
										7.02	-0.085259	-0.002748	-0.002058
										7.03	-0.004769	0.001764	0.020632
										7.04	-0.036091	0.015249	0.009778
										7.05	-0.038302	0.002581	-0.005646
										7.06	-0.007378	0.009829	-0.031377
										7.07	-0.008363	0.018313	-0.01384
										7.08	0.005785	0.022131	-0.008215
										7.09	0.006434	0.018058	-0.002612
										7.1	0.018585	0.036257	-0.004486
										7.11	0.041882	-0.084276	0.071539
										7.12	0.042947	-0.107254	0.013812
										7.13	0.020381	-0.076908	-0.082249
										7.14	0.023891	-0.071059	-0.083374
										7.15	0.039264	-0.041181	-0.065022
										7.16	0.034877	-0.040785	0.004892
										7.17	0.053203	-0.078292	0.075039
										7.18	0.036365	-0.035145	-0.019323
										7.19	0.033129	0.006772	-0.020074
										7.2	0.009468	0.011984	-0.009336
										7.21	0.016252	0.022113	0.018829
										7.22	0.009595	0.013802	-0.010677
										7.23	0.022022	-0.079208	-0.089095
										7.24	-0.01455	-0.079007	-0.090753
										7.25	-0.082445	-0.063862	-0.049952
										7.26	-0.114784	-0.03614	-0.014103
										7.27	-0.114707	-0.037718	-0.022672
										7.28	-0.098908	-0.055055	-0.045125
										7.29	-0.106929	-0.05195	-0.036809
										7.3	-0.072411	-0.068921	-0.073579
										7.31	-0.009119	-0.080428	-0.098237
										7.32	0.013418	-0.083576	-0.099174
										7.33	0.014182	-0.089602	-0.081194
										7.34	0.021432	-0.037952	0.000785
										7.35	0.034789	-0.065766	0.064488
										7.36	0.039836	-0.0822	0.065806
										7.37	0.039234	-0.078824	0.090807
										7.38	0.040219	-0.078385	0.096019
										7.39	0.038123	-0.077976	0.101499
										7.4	0.035304	-0.077784	0.104126
										7.41	0.038171	-0.077389	0.101662
										7.42	0.031826	-0.076221	0.10328
										7.43	0.020451	-0.077101	0.101737
										7.44	0.035665	-0.078704	0.099621
										7.45	0.035655	-0.077866	0.098528
										7.46	0.033889	-0.079166	0.100188
										7.47	0.035551	-0.07781	0.09989
										7.48	0.018976	-0.074587	0.095308
										7.49	0.006774	-0.067346	0.090265
										7.5	0.01258	-0.060931	0.084344
										7.51	6.8e-05	-0.052553	0.070282
										7.52	0.002127	-0.049171	0.067949
										7.53	0.017104	-0.056732	0.077407
										7.54	0.012063	-0.046926	0.065267
										7.55	0.015323	-0.051585	0.043829
										7.56	0.029395	-0.036867	0.008273
										7.57	-0.019275	0.007876	-0.00124
										7.58	0.004838	-0.020725	0.001271
										7.59	0.000965	0.005791	0.023701
										7.6	0.031554	-0.004262	0.018728
										7.61	0.032776	-0.003217	0.029632
										7.62	-0.018228	-0.013647	0.013715
										7.63	-0.049884	-0.011233	0.023727
										7.64	-0.099069	-0.005342	0.009266
										7.65	-0.048334	-0.012094	0.013308
										7.66	-0.017279	-0.000278	0.012749
										7.67	-0.014254	-0.026086	-0.022332
										7.68	-0.032704	-0.015367	-0.006106
										7.69	0.007014	-0.005286	-0.017828
										7.7	0.027721	-0.016581	-0.046939
										7.71	0.011679	0.020828	-0.012684
										7.72	0.010856	-0.034076	-0.051
										7.73	0.030651	-0.058213	-0.048203
										7.74	0.021085	-0.05838	-0.044522
										7.75	0.025869	-0.073503	-0.076137
										7.76	0.025297	-0.055019	-0.079154
										7.77	-0.011289	-0.003631	-0.029541
										7.78	-0.00386	-0.029534	0.038519
										7.79	-0.016093	-0.004193	0.012157
										7.8	-0.006047	0.012807	0.010678
										7.81	-0.00614	0.020078	-0.007149
										7.82	-0.003708	0.019554	0.000515
										7.83	-0.026726	0.022917	-0.000977
										7.84	0.011819	0.001453	0.004516
										7.85	0.013652	-0.024315	0.027179
										7.86	0.031005	-0.001555	0.019215
										7.87	0.008613	-0.015783	0.014226
										7.88	0.003115	0.004778	-6.9e-05
										7.89	0.016602	0.0301	0.002738
										7.9	0.018832	-0.005664	-0.028457
										7.91	0.029432	0.008647	0.009523
										7.92	0.021511	0.012554	-0.008126
										7.93	-0.082444	-0.019069	0.011954
										7.94	-0.000575	0.02945	-0.007209
										7.95	0.010136	0.013182	0.007453
										7.96	0.032854	-0.023899	0.001578
										7.97	0.000689	-0.000594	-0.027585
										7.98	-0.004776	-0.005671	0.005914
										7.99	0.020689	-0.010733	0.014472
										8	0.022283	-0.001356	0.008056
										8.01	-0.010003	-0.044646	-0.027162
										8.02	0.012375	-0.070925	-0.043374
										8.03	0.028202	-0.039539	-0.016516
										8.04	0.02728	-0.041542	-0.056456
										8.05	0.032098	-0.015509	-0.040684
										8.06	0.018518	0.043228	-0.006937
										8.07	0.004495	0.002882	-0.004107
										8.08	0.027892	-0.021613	0.036303
										8.09	0.005402	-0.027241	-0.021796
										8.1	0.013252	0.022417	-0.016148
										8.11	0.005478	0.004146	0.007714
										8.12	0.005823	0.005498	0.016137
										8.13	0.007578	-0.022884	-0.009906
										8.14	0.005936	-0.013228	-0.035043
										8.15	0.004813	0.034155	-0.038945
										8.16	-0.020852	-0.03093	-0.00714
										8.17	0.017143	-0.016888	-0.006697
										8.18	0.016224	-0.006563	-0.042108
										8.19	-0.008866	-0.07334	-0.044616
										8.2	-0.02503	-0.002776	-0.042341
										8.21	-0.05861	-0.003975	-0.01888
										8.22	0.015926	0.024323	-0.014709
										8.23	0.02746	-0.005014	0.006633
										8.24	0.005583	0.008284	-0.006811
										8.25	0.004807	0.010701	-0.00616
										8.26	0.010769	0.008388	-0.013084
										8.27	0.020949	0.00279	0.003631
										8.28	-0.069734	-0.004046	0.002533
										8.29	-0.103929	-0.013867	0.004432
										8.3	-0.081707	-0.009362	0.003248
										8.31	-0.04229	-0.015318	-0.023847
										8.32	-0.028311	-0.029962	-0.035015
										8.33	0.020518	0.017452	-0.03811
										8.34	0.007107	0.007392	-0.029544
										8.35	0.01715	0.005556	-0.010768
										8.36	-0.051346	-0.010862	0.001068
										8.37	-0.070101	-0.021481	-0.014838
										8.38	-0.040002	-0.009718	-0.019618
										8.39	-0.022767	-0.000167	-0.016812
										8.4	-0.035137	-0.003504	0.000343
										8.41	-0.035571	-0.002447	0.000866
										8.42	-0.065167	-0.00539	0.003566
										8.43	-0.067525	-0.009695	0.006482
										8.44	-0.070218	-0.009327	0.007777
										8.45	-0.051954	-0.007363	0.010729
										8.46	-0.009794	-0.027929	0.034483
										8.47	-0.004607	-0.033633	0.034865
										8.48	-0.018622	-0.013666	0.010575
										8.49	0.001461	-0.057996	-0.037534
										8.5	0.005817	-0.052928	-0.059516
										8.51	-0.003371	-0.035253	-0.023472
										8.52	-0.007762	0.003017	-0.01534
										8.53	0.004154	0.00476	-0.039153
										8.54	0.017585	0.020783	-0.039916
										8.55	0.013615	0.013045	-0.001335
										8.56	0.014502	0.013867	-0.018114
										8.57	0.024966	0.006712	0.020097
										8.58	-0.007054	0.033702	-0.007591
										8.59	-0.016501	-0.001733	0.005771
										8.6	0.02446	0.009411	-0.004342
										8.61	0.016453	0.001471	-0.044251
										8.62	0.022656	-0.015986	0.003707
										8.63	0.038705	0.01127	0.023217
										8.64	0.020443	0.002878	0.010971
										8.65	0.010513	0.034322	0.003618
										8.66	0.024099	0.026602	-0.002306
										8.67	-0.00959	-0.000468	-0.010055
										8.68	-0.026672	0.017259	-0.000276
										8.69	-0.001778	0.020175	-0.008732
										8.7	0.010043	0.004131	0.000665
										8.71	0.031461	-0.00508	0.022102
										8.72	0.017216	0.022592	-0.010427
										8.73	0.009999	0.028672	-0.021863
										8.74	0.025073	0.028271	-0.01559
										8.75	-0.020712	-0.003827	0.015617
										8.76	-0.02704	0.002292	-0.000636
										8.77	0.015951	0.006	0.01775
										8.78	0.00806	-0.025174	-0.033648
										8.79	0.022097	0.015002	-0.003356
										8.8	0.027923	0.032711	0.005818
										8.81	0.018136	-0.005138	0.015799
										8.82	-0.000273	-0.008381	0.028936
										8.83	0.017481	0.013545	-0.010576
										8.84	0.046923	0.00098	0.020295
										8.85	0.03343	-0.01161	-0.037032
										8.86	-0.035018	0.012041	-0.012201
										8.87	-0.029636	0.012619	-0.002621
										8.88	-0.036949	0.004333	-0.001195
										8.89	-0.025936	-0.013147	0.011077
										8.9	0.009854	-0.015817	-0.015826
										8.91	0.019524	-0.007368	0.003541
										8.92	0.010292	0.037487	-0.015284
										8.93	0.015363	0.015318	-0.028328
										8.94	0.009986	0.031931	-0.025572
										8.95	0.004377	0.014251	0.000659
										8.96	0.003274	-0.007922	0.000644
										8.97	0.015005	-0.020932	0.019647
										8.98	-0.007565	-0.002115	0.007468
										8.99	0.022475	-0.013632	0.004602
										9	0.01667	0.012347	-0.030149
